# Supplementary material for: Novel multi-drug delivery hydrogel using scar-homing liposomes improves spinal cord injury repair
Source: PubMed Central journal article supplement — Theranostics. 2018 Aug 7;8(16):4429–46. doi: 10.7150/thno.26717 (PMC6134929; doi:10.7150/thno.26717), 2018-08-07
Supplement: thnov08p4429s1.pdf [file thnov08p4429s1.pdf]

1    **Supporting Information**

2

3                    **Novel Multi-Drug Delivery Hydrogel Using Scar-Homing Liposomes**

4                    **Improves Spinal Cord Injury Repair**

5    *Qingqing Wang<sup>#</sup>, Hongyu Zhang<sup>#</sup>, Helin Xu<sup>#</sup>, Yingzheng Zhao, Zhengmao Li, Jiawei Li,*

6    *Haoli Wang, Deli Zhuge, Xin Guo, Huazi Xu, Jones Salazar, Xiaokun Li, Xiaofeng Jia\*,*

7    *Jian Xiao\**

8

9

10

11

12

13

14

15

16

17

18

19

20

21

## SUPPLEMENTAL METHODS

### Fourier transform infrared spectroscopy (FTIR) assay of the hydrogels

FTIR was used to analyze the structural changes of HP, CAQK-LIP@HP and CAQK-LIP-GFs/DTX@HP following the protocols by FTIR 8400 spectrophotometer (Shimadu, Japan) using the potassium bromide disk. Each spectrum was acquired in transmittance mode with a resolution of  $2\text{ cm}^{-1}$  and spectral range of  $4000\text{--}400\text{ cm}^{-1}$ . The analysis was finally focused on the range of  $1700\text{--}700\text{ cm}^{-1}$  as the most informative in the IR spectra of HP for these assays.

### *In Vitro* Release Profiles of aFGF/BDNF/DTX from CAQK-LIP-GFs/DTX and CAQK-LIP-GFs/DTX@HP.

The releases of aFGF, BDNF and DTX were measured according to the literature [30, 31]. In brief, 1 ml aliquots of the aFGF, CAQK-LIP-GFs/DTX, and CAQK-LIP-GFs/DTX@HP (containing  $5\text{ }\mu\text{g}$  aFGF,  $5\text{ }\mu\text{g}$  BDNF and  $5\text{ mg}$  DTX) were placed in dialysis bags (MW cutoff of  $25\text{ KDa}$ ), and the bags were immersed in  $10\text{ ml}$  PBS (the release medium for aFGF and BDNF) or PBS containing  $0.5\%$  (v/v) Tween-80 (PBST, the release medium for DTX) under shaking at  $100\text{ rpm/min}$  at  $37\text{ }^{\circ}\text{C}$ . At specific time points, aFGF, DTX, and BDNF were collected in the supernatant, and the supernatant was replaced with the same volume of fresh solution. The amounts of released GFs (aFGF and BDNF) were quantified with an aFGF and BDNF enzyme-linked immunosorbent assay kit (ELISA, Westtang System, Shanghai, China),

and the amount of released DTX was detected by high-performance liquid chromatography (HPLC).

### **Primary Cortical Neurons Cultures**

Primary cortical neurons were extracted from the embryos of pregnant Sprague-Dawley (SD) rats (E18). In brief, the cerebral cortex was separated and cut into approximately 1-mm pieces in precooled Hank's buffer (Gibco-Invitrogen). Subsequently, the tissues were digested with 0.125% trypsin-EDTA (Solarbio, Beijing, China) for 25 mins at 37 °C. After trypsinization, the solution was filtered using a 100-μm cell strainer (BD Falcon) and then was centrifuged at 1200 rpm for 5 min. The cell pellet was resuspended in complete Dulbecco's Modified Eagle Medium/Nutrient Mixture F-12 (DMEM/F-12, Gibco-Invitrogen) medium and incubated in 5% CO<sub>2</sub> at 37 °C. After 4 h, the cells were refreshed and cultured in neurobasal medium (Gibco-Invitrogen) with 0.5 mM L-Glutamine and 2% B27 (GlutaMAX™ Supplement, Gibco).

### **Biocompatibility of CAQK-LIP@HP and CAQK-LIP-DTX@HP**

The cytotoxicity of CAQK-LIP@HP hydrogel was assessed in neurons by using the Cell Counting Kit-8 kit (CCK-8, Dojindo Laboratories Inc., Kumamoto, Japan) and LDH-kit (Beyotime Institute of Biotechnology, Shanghai, China). The neurons were seeded into 48-well transwell plates with a seeding density of  $2 \times 10^4$  cells per well and incubated for 48 h in the complete neurobasal medium at 37 °C. CAQK-LIP@HP (from 1 μL/mL to 50

64  $\mu\text{L/mL}$ ) was added into the transwell inserts and co-incubated for 24h. After that 0  $\mu\text{L}$  of  
65 CCK-8 or 250  $\mu\text{L}$  LDH was added into each well. Four hours later, the medium in  
66 48-well transwell plates was transferred to 96-well transwell plates, and the 450 nm (for  
67 CCK-8) or 490 nm (for LDH) absorption was measured using a microplate  
68 spectrophotometer (Spectramax 190, Molecular Devices Corporation, Sunnyvale, CA).  
69 The Biocompatibility of CAQK-LIP@HP and CAQK-LIP-DTX@HP was also  
70 determined by performing Annexin V-fluorescein isothiocyanate (Annexin  
71 V-FITC)/Propidium iodide (PI) staining and calcium fluorescein-AM/PI double staining  
72 assay using SH-SY5Y cells (ScienCell, Carlsbad, CA, USA). Cells were seeded on  
73 6-well transwell plate at  $2 \times 10^5$  cells/well and incubated for 24 h to adhere. Then  
74 CAQK-LIP@HP or CAQK-LIP-DTX@HP was added into the transwell inserts for 24h  
75 incubation. After that, cells were collected and stained using PI/Annexin V-FITC kit  
76 (Invitrogen, Carlsbad, CA, USA); the fluorescence intensity was analyzed using a flow  
77 cytometer (BD, Biosciences). For AM/PI staining, cells were gently washed twice with  
78 PBS, 2  $\mu\text{M}$  of calcein AM and 15  $\mu\text{g}\cdot\text{M}^{-1}$  PI were added to the cells, and culture plates  
79 were incubated at  $37^\circ\text{C}$  for 30 min. Finally, the dye solution was removed, and the  
80 samples were washed with PBS three times. A fluorescence microscope (Nikon) was used  
81 to assess the slides. All experiments were performed in triplicate. To evaluate the  
82 biocompatibility of the CAQK-LIP@HP or CAQK-LIP-DTX@HP complex, spinal cord  
83 injury model was created and 100  $\mu\text{l}$  hydrogel was orthotopically injected and 100  $\mu\text{l}$   
84 saline solution was injected as a control. After 6h, 1, 3 and 7 days, the spinal cords were

collected and the inflammation was detected by quantitative real-time PCR (qRT-PCR) as described previously. White blood cells were measured in blood samples, which were collected 3 days after injury.

#### **Western Blot.**

For the in vivo protein analysis, spinal cord segment (0.5 cm in length) at the contusion epicenter was dissected and rapidly stored at  $-80^{\circ}\text{C}$  for western blot assays. For protein extraction, the tissue was homogenized in modified radioimmune precipitation assay (RIPA) lysis buffer (20 mM Tris-HCl, pH 7.5, 150 mM NaCl, 1 mM Ethylenediaminetetraacetic acid (EDTA), 1% Triton-X100, 0.5% sodium dexoycholate, 1 mM phenylmethanesulfonylfluoride (PMSF) and 10  $\mu\text{g}/\text{mL}$  leupeptin). In vitro, cells were lysed in RIPA buffer (25 mM Tris-HCl, 150 mM NaCl, 1 % Nonidet P-40, 0.5 % sodium deoxycholate, and 0.1% sodium dodecyl sulfate (SDS)) containing with 1 mM PMSF and 500g/mL DNase I. The extracts above were quantified with bicinchoninic acid (BCA) reagents (Solarbio, Beijing, China) and 40  $\mu\text{g}$  proteins were loaded and separated using 10% sodium do-decyl sulfate-polyacrylamide gel electrophoresis (SDS-PAGE). Next, the separated proteins were transferred onto polyvinylidenedifluoride (PVDF) membranes (Bio-Rad, Hercules, CA, USA), followed by 5 % non-fat milk (Bio-Rad) block for 1h. Membranes were incubated overnight at  $4^{\circ}\text{C}$  with the following primary antibodies: Nestin (1:200, Abcam), Growth associated protein 43 (GAP-43) (1:500, Abcam), Laminin (1:1000, Abcam), Neurocan (1:200, Abcam), Neuron-glia antigen 2

(NG2) (1:200, Abcam), myelin basic protein (MBP) (1:1000, Cell Signaling Technologies), Ace-tubulin (1:2000, Cell Signaling Technologies), Tau (1:1000, Abcam), Dynein (1:500, Sigma-Aldrich) and GAPDH (1:5000, Santa Cruz Biotechnology); later the membranes were immersed for 1h in corresponding horseradish peroxidase-conjugated secondary antibodies. The blots were visualized by Chemi DocXRS + Imaging System (Bio-Rad, Hercules, CA, USA); the grey density was analyzed by the Image Lab software. All experiments were repeated three times.

#### **Magnetic Resonance Imaging (MRI)**

Spinal MRI was performed to evaluate the damaged and inflammatory area 7 days after SCI. All MRI experiments were performed on a 3 T/10 cm horizontal bore magnet (GE Signa HDxT 3.0T, America) using a spin-echo T2-weighted MRI sequence (TR =1500 ms, TE=92 ms, FOV=9.0 mm, Slice thickness=1.5 mm, Spacing=0 mm).

#### **Biotinylated Dextran-amine (BDA) Anterograde Tracer**

Two weeks post-SCI, rats were anesthetized and the procedures were performed as methods described in these publications 28-29. In brief, after placing the animal in a stereotaxic apparatus, the skin was incised in the midline to expose the skull. Approximately 500 nl of a mixture of dextran amine conjugated with Texas Red (10% BDA; MW 10,000; Invitrogen) was injected through a glass micropipette (diameter -50 mm) at 8 positions on the left hemisphere, approximately spanning the rostrocaudal

127 extent of the hindlimb sensorimotor cortex. BDA delivery took 5 min at each site. The  
128 micropipette tip remained in place for 20s before withdrawal. After two weeks, the spinal  
129 cord tissues were collected and handled with color rendering.

### 131 **Transmission Electron Microscopy (TEM)**

132 Spinal cord tissue samples were fixed in 2.5% (w/v) glutaraldehyde solution overnight.  
133 Following post-fixation in 2% (v/v) osmium tetroxide, the tissues were blocked with 2%  
134 (v/v) uranyl acetate and dehydrated in a series of acetone washes followed by Araldite  
135 embedding. Semi-thin section and toluidine blue staining were carried out to observe the  
136 location. Finally, ultra-thin sections of at least six blocks per sample were cut and  
137 observed using a TEM.

### 139 **Detection of the individual and synergistic effects of aFGF, BDNF and DTX on** 140 **multiple trials in vitro.**

141 To emphasize the new drug combination and compared with our previous types of  
142 heparin-poloxamel hydrogel drug delivery systems, multiple trials in vitro were added. To  
143 test the individual and synergistic effects of aFGF, BDNF and DTX on the axonal  
144 extension, wound healing of neurons was performed. Primary cortical neurons were  
145 plated into poly-L-lysine-coated 12-well plates, half the medium was replenished every  
146 2-3 days, a scratch was made across the center of each well with a plastic pipet tip  
147 (ART10, Thermofisher) on DIV10. After scratching, the medium was supplemented with

3.34  $\mu\text{g/ml}$  CSPGs and 20  $\mu\text{l}$  hydrogels (CAQK-LIP @HP-aFGF, CAQK-LIP-BDNF@HP, CAQK-LIP-DTX@HP, CAQK-LIP-GFs/DTX@HP) (containing 5  $\mu\text{g/mL}$  aFGF/BDNF and/or 50  $\mu\text{g/mL}$  DTX) were added into the transwell inserts (pore size 0.4 mm) and co-incubated for 48h. After that (DIV12), cells were fixed with paraformaldehyde (4%) and stained with Tuj-1 (1:1000, Abcam). To detect the individual and synergistic effects of the drugs on the migration of fibroblasts, wound healing of Human Brain Vascular Adventitial Fibroblasts (HBVAFs, Sciencell, Carlsbad, CA, USA) was used. HBVAFs were plated into poly-L-lysine-coated 12-well plates and cultured in the complete Fibroblast Medium (FM, Sciencell) which was changed every two days. When the culture reaches above than 90% confluency, a scratch was made across the center of each well, then 20  $\mu\text{l}$  hydrogels (CAQK-LIP @HP-aFGF, CAQK-LIP-BDNF@HP, CAQK-LIP-DTX@HP, CAQK-LIP-GFs/DTX@HP) (containing 5  $\mu\text{g/mL}$  aFGF/BDNF and/or 50  $\mu\text{g/mL}$  DTX) were added into the transwell inserts and co-incubated for 72h. After that, the cells were fixed with paraformaldehyde (4%) and stained with F-actin (1:2000, Abcam).

### **Comparisons between multiple experimental groups**

In vivo experiments, we set six groups firstly as SCI, CAQK-LIP-GFs@HP, CAQK-LIP-DTX@HP, CAQK-LIP-GFs/DTX@HP, LIP-GFs/DTX@HP and CAQK-LIP-GFs/DTX to measure the functional effects of the different groups. Results from multiple comprehensive evaluations systems including motor function, histology

and magnetic resonance imaging (MRI) (Figure 3), however, showed that there was no significant improvement in rats treated with CAQK-LIP-GFs/DTX compared with SCI rats. We speculated that drugs without HP can easily flow away so that their efficacy cannot be exerted. Thus, in the further experiments which were performed to confirm the roles and mechanism of GFs, DTX, CAQK, and their combined effects (Figure 6, Figure 7B-F, etc.), we established the model only from these five groups: SCI, CAQK-LIP-GFs@HP, CAQK-LIP-DTX@HP, CAQK-LIP-GFs/DTX@HP, and LIP-GFs/DTX@HP group.

For in vitro experimentation, first we aimed to evaluate the effects of the DTX and GFs without HP on neurons growth in vitro, and confirm the mechanisms of the drugs, so we initially chose Con, CAQK-LIP-GFs, CAQK-LIP-DTX, CAQK-LIP-GFs/DTX, and CAQK-LIP-GFs/DTX@HP group to investigate the roles of GFs, DTX, and their combined effects by staining Ace-tubulin/Tyr-tubulin (Figure 7H-J). However, by comparing the effects of CAQK-LIP-GFs/DTX and CAQK-LIP-GFs/DTX@HP, we found that HP also improved the functions of the drugs in vitro, which further demonstrated the positive role of HP. Therefore, in the following experiments, we chose these four sample groups: Con, CAQK-LIP-GFs@HP, CAQK-LIP-DTX@HP, and CAQK-LIP-GFs/DTX@HP group, and further investigated the functions and mechanisms of GFs, DTX, and their combined effects.

To emphasize the new drug combination and compared with our previous types of heparin-poloxamel hydrogel drug delivery systems, we added some in vitro experiments

190 with six groups (Con, CAQK-LIP @HP-aFGF, CAQK-LIP-BDNF@HP,  
191 CAQK-LIP-DTX@HP, CAQK-LIP-GFs/DTX@HP) under the comments of the reviews  
192 (Figure S4).

Figure S1

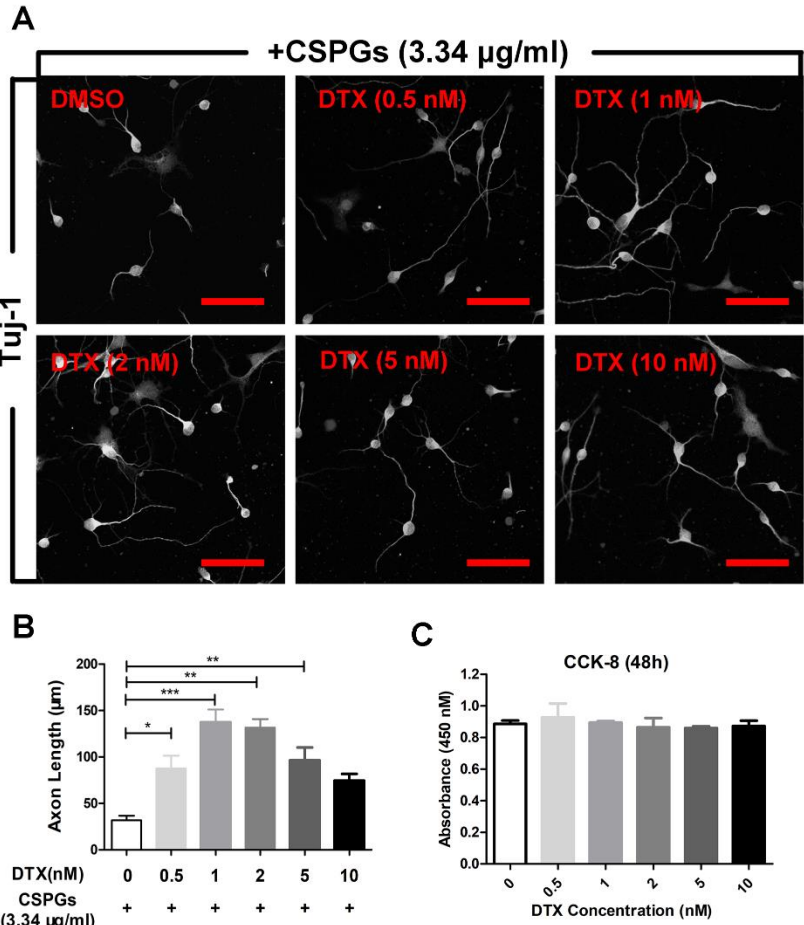

Figure S1 DTX promoted axonal extension. (A) Representative images of neurons stained with Tuj-1 that were treated with different concentration of DTX at DIV5. Scale bar represents 50  $\mu\text{m}$ . (B) Quantification of the mean axonal length (from the junction cell body and axon to the end of the axon) in each group from A. N= 4. (C) Viability of neurons after incubation in different concentrations of DTX for 48 h (CCK-8 assay).

**Figure S2**

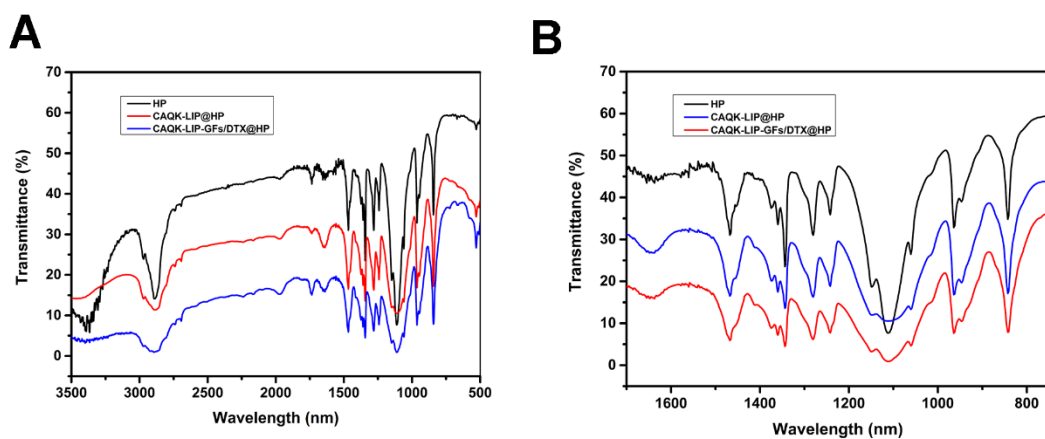

Figure S2 Characterization of the Complex Hydrogels. (A) FTIR spectra of lyophilized HP, CAQK-LIP@HP and CAQK-LIP-GFs/DTX@HP hydrogels in the range of 4000–400 cm<sup>-1</sup>. (B) FTIR spectra of lyophilized HP, CAQK-LIP@HP and CAQK-LIP-GFs/DTX@HP hydrogels in the range of 1700–700 cm<sup>-1</sup>.

Figure S3

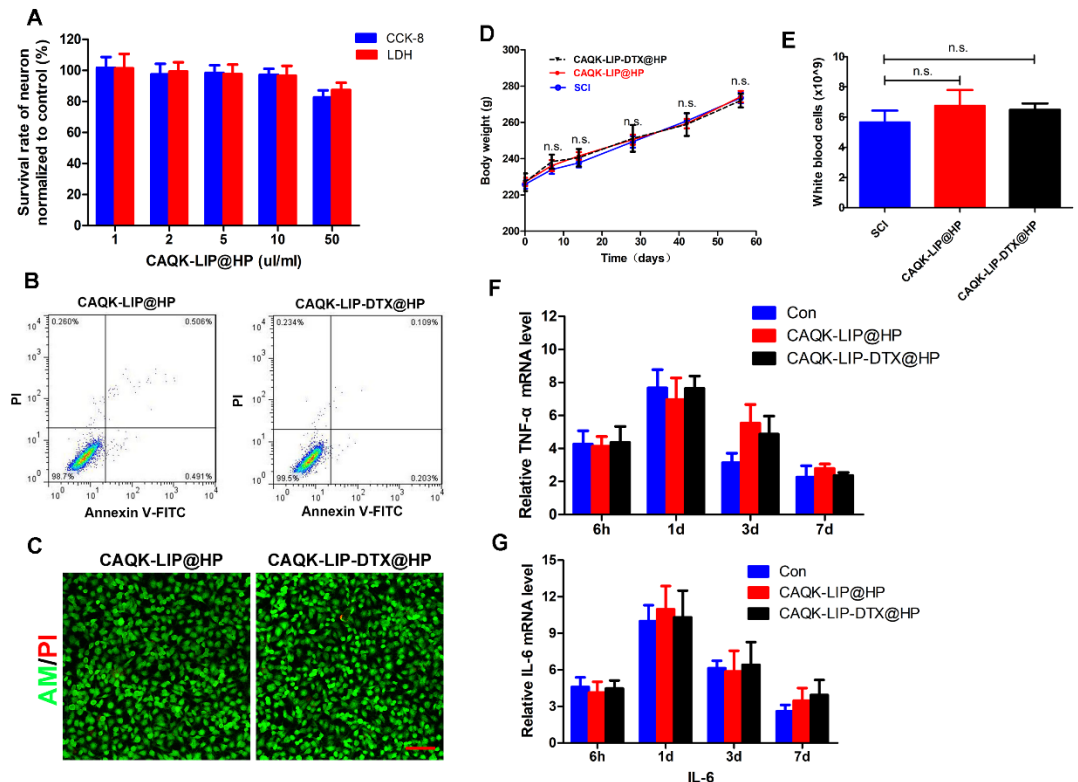

Figure S3 Cytotoxicity and Biocompatibility of the CAQK-LIP-GFs/DTX@HP in vitro and in vivo. (A)The viability of SH-SY5Y cells after incubation with different formulations of CAQK-LIP @HP for 24 h using the CCK-8 and LDH kits. (B-C) The survival rate of SH-SY5Y cells with or without treatment of CAQK-LIP @HP using PI/annexin V-FITC staining and Calcein-AM/PI staining. Scale bar = 10  $\mu$ m. All experiments were performed in triplicate. (D) Animal body weight at various time-points after spinal cord contusion injury, n = 9. (E) Number of white blood cells in blood samples 3 days after SCI, n = 4. (F-G) Relative mRNA of TNF- $\alpha$  and IL-6 in the injured spinal cord at various time-points after SCI. N = 3. \*P < 0.05, \*\*P< 0.01.

Figure S4

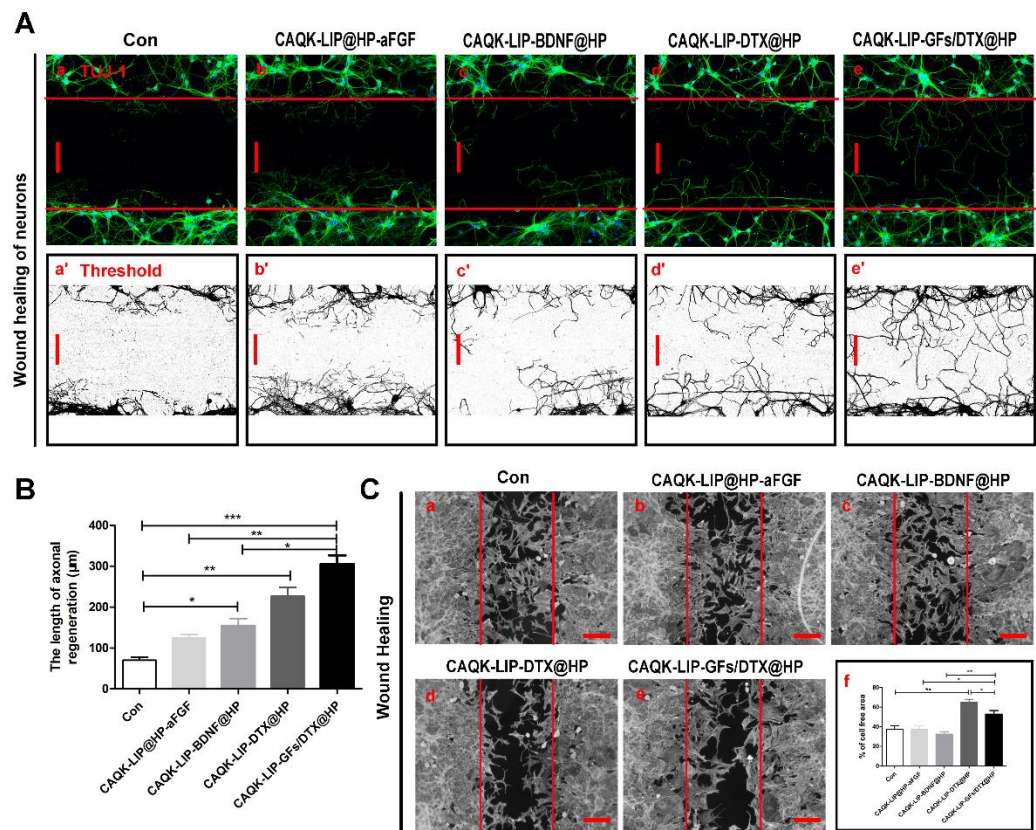

218

219 Figure S4 The individual and synergistic effects of aFGF, BDNF, and DTX on multiple

220 trials in vitro. (A) Representative wound healing images of neurons with different

221 treatment and stained with Tuj-1 at DIV12. (B) Quantitative analysis of the length of

222 axonal regeneration. N= 4. (C) Representative wound healing images and quantification

223 data of HBVAFs stained with F-actin at 72h after treatment. Scale bar = 100  $\mu\text{m}$ . \*P <

224 0.05, \*\*P < 0.01.

Figure S5

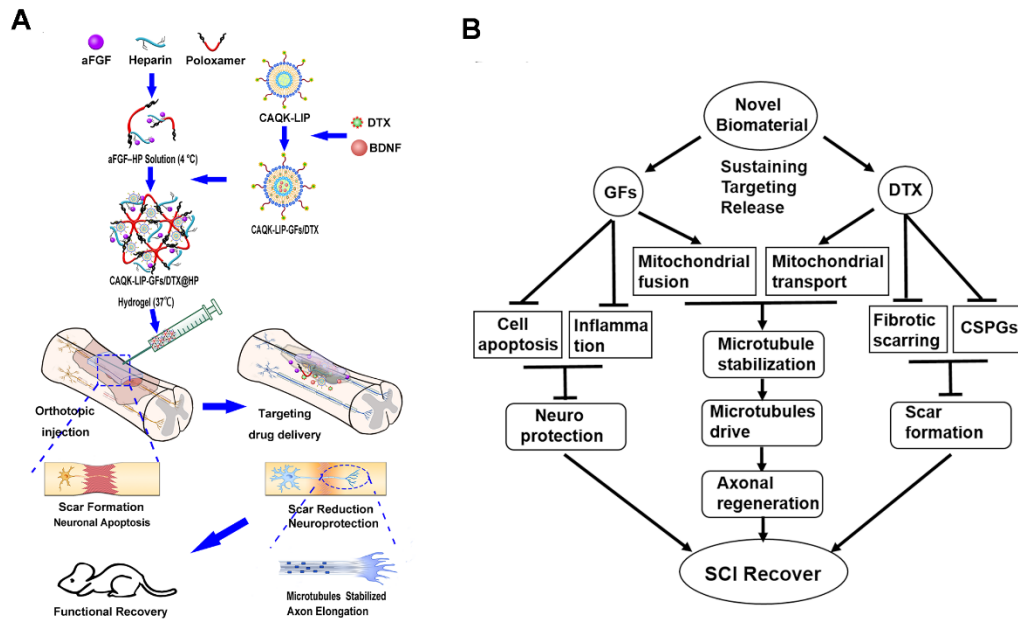

Figure S5 (A) Schematic diagram of injectable hydrogel complex as an in-situ targeting multiple drugs delivery system for the recovery of the spinal cord. (B) Schematic showing CAQK-LIP-GFs/DTX@HP loading multiple drugs has different therapeutic targets, multifunctional and synergistic therapeutic effects in SCI directed to counteract multiple injury mechanisms.
